# Supplementary material for: Distinct phosphorylation states of mammalian CaMKIIβ control the induction and maintenance of sleep
Source: PLoS Biol. 2022 Oct 4;20(10):e3001813. doi: 10.1371/journal.pbio.3001813 (PMC9531794; doi:10.1371/journal.pbio.3001813)
Supplement: S1 Table — (XLSX) [file pbio.3001813.s014.xlsx]

## Sheet: Sheet1
Table S1: Summary of AAV applications and conditions
Aplications in the paper	Use cases	pAAV vector	Dosage (vg/mouse)
Neuronal expression of Camk2b	Fig.1C-J, Fig.5, Fig.6A-C, Fig.S3, Fig.S4, Fig.S6A-B, Fig.S10, Fig.S11, Fig.S12A	P(hSyn1)-Camk2b-3'UTR-WPRE-SV40pA	5.0 x 1010
Neuronal expression of H2B-mCherry	Fig.S2	P(hSyn1)-H2B-mCherry-3'UTR-WPRE-SV40pA	5.0 x 1010
Camk2a promoter-driven expression of Camk2b	Fig.3A-F, Fig.4, Fig.S9A-C	P(Camk2a)-Camk2b-3'UTR-WPRE-SV40pA	1.0 x 1011
Camk2b promoter-driven expression of Camk2b	Fig.S9D-F	P(Camk2b)-Camk2b-3'UTR-WPRE-SV40pA	2.0 x 1011
Cre-dependent expression of Camk2b	Fig.3G-I	P(hSyn1)-DIO-Camk2b-3'UTR-WPRE-SV40pA	2.0 x 1011
Neuronal expression of Camk2b deletion mutant	Fig.2B-C	P(hSyn1)-Camk2b(del)-3'UTR-WPRE-SV40pA	2.5 x 1010
Neuronal expression of AIP2	Fig.2E-J, Fig.S6C-D, Fig.S7	P(hSyn1)-mCherry-AIP2-Map2DTE-WPRE-SV40pA	2.0 x 1011
